# Supplementary material for: An accurate and efficient method for large-scale SSR genotyping and applications
Source: PubMed Central journal article supplement — Nucleic Acids Res. 2017 Feb 10;45(10):e88. doi: 10.1093/nar/gkx093 (PMC5449614; doi:10.1093/nar/gkx093), 2017-02-10
Supplement: gkx093_supp.pdf [file gkx093_supp.pdf]

## Supplemental Methods and Supplemental Tables 1 – 9

### An accurate and efficient method for large-scale SSR genotyping and applications

Lun Li<sup>1§</sup>, Zhiwei Fang<sup>1§</sup>, Junfei Zhou<sup>1</sup>, Hong Chen<sup>2</sup>, Zhangfeng Hu<sup>1</sup>, Lifeng Gao<sup>1</sup>, Lihong Chen<sup>1</sup>, Sheng Ren<sup>3,4</sup>, Hongyu Ma<sup>5</sup>, Long Lu<sup>1,3</sup>, Weixiong Zhang<sup>1,6,7\*</sup> and Hai Peng<sup>1\*</sup>

<sup>1</sup> Institute for Systems Biology, Jiangnan University, Wuhan, Hubei 430056, China.

<sup>2</sup> Center for Development of Science and Technology, Ministry of Agriculture, P.R. China, Beijing 100122, China.

<sup>3</sup> Division of Biomedical Informatics, Cincinnati Children's Hospital Research Foundation, 3333 Burnet Avenue, Cincinnati, OH 45229-3026, USA.

<sup>4</sup> Department of Mathematical Sciences, McMicken College of Arts & Sciences, University of Cincinnati, 2815 Commons Way, Cincinnati, OH 45221-0025.

<sup>5</sup> Thermo Fisher Scientific, Shanghai 20051, China.

<sup>6</sup> Department of Computer Science and Engineering, Washington University in St. Louis, St. Louis, MO 63130, USA

<sup>7</sup> Department of Genetics, Washington University School of Medicine, St. Louis, MO 63130, USA.

§ Equal contribution.

\* Correspondence: penghai@jhun.edu.cn and weixiong.zhang@wustl.edu

#### ABSTRACT

Accurate and efficient genotyping of Simple Sequence Repeats (SSRs) constitutes the basis of SSRs as an effective genetic marker with various applications. However, the existing methods for SSR genotyping suffer from low sensitivity, low accuracy, low efficiency and high cost. In order to fully exploit the potential of SSRs as genetic marker, we developed a novel method for SSR genotyping, named as AmpSeq-SSR, which combines multiplexing PCR, targeted deep sequencing and comprehensive analysis. AmpSeq-SSR is able to genotype potentially more than a million SSRs at once using the current sequencing techniques. In the current study, we simultaneously genotyped 3,105 SSRs in 8 rice varieties, which were further validated experimentally. The results showed that the accuracies of AmpSeq-SSR were nearly 100% and 94% with a single base resolution for homozygous and heterozygous samples, respectively. To demonstrate the power of AmpSeq-SSR, we adopted it in two applications. The first was to construct discriminative fingerprints of the rice varieties using 3,105 SSRs, which offer much greater discriminative power than the 48 SSRs commonly used for rice. The second was to map *Xa21*, a gene that confers persistent resistance to rice bacterial blight. We demonstrated that genome-scale fingerprints of an organism can be efficiently constructed and candidate genes, such as *Xa21* in rice, can be accurately and efficiently mapped using an innovative strategy consisting of multiplexing PCR, targeted sequencing and computational analysis. While the work we present focused on rice, AmpSeq-SSR can be readily extended to animals and microorganisms.

**Supplemental Methods** – Construction and sequencing of Ampli-Seq libraries

**Supplementary Table 1.** The rice varieties used in this study.

**Supplementary Table 2.** The genotypes, coverages, stutter ratios and amplicon lengths of the 3,105 target SSRs in varieties A to H.

**Supplementary Table 3.** The accuracy of AmpSeq-SSR on pseudo-heterozygous variety ij

**Supplementary Table 4.** The decrease of SSR stutter ratios in varieties B-H when using only the target SSRs whose stutter ratios were no greater than 0.2 in variety A.

**Supplementary Table 5.** Some SSRs tend to be incorrectly genotyped.

**Supplementary Table 6.** Many inconsistent SSRs in the eighth variety can be filtered by the other seven varieties.

**Supplementary Table 7.** Comparable SSR pairs and length differences between their amplicons.

**Supplementary Table 8.** The genotypes, coverages and stutter ratios and amplicon lengths of the differential SSRs between each of the three pairs of NILs.

**Supplementary Table 9.** AmpSeq-SSR possesses high reproducibility.

## **Supplemental methods – Construction and sequencing of Ampli-Seq libraries**

This protocol has been used on eight rice varieties in the current study. The genomic DNAs of varieties A-N in Supplemental Table 1 were extracted. Ampli-Seq libraries of varieties A-N were then constructed and sequenced using the S5 sequencing platform. Ampli-Seq libraries of varieties A-H were also constructed separately and sequenced using the MiSeq sequencing platform. The main reagents for Ampli-Seq library constructions were included in Ion AmpliSeq™ Library Kit 2.0 (Cat No. 4475345, Thermo, USA), and methods for Ampli-Seq library constructions followed the main principles in its manual (Publication Part Number MAN0006735, Revision B.0). The Ion AmpliSeq™ Library Kit 2.0 includes the components of 5× Ion AmpliSeq™ HiFi Mix, FuPa Reagent, Switch Solution, DNA Ligase, Ion AmpliSeq™ Adapters, Platinum® PCR SuperMix HiFi, Library Amplification Primer Mix and Low TE.

### **Step 1. DNA extraction and quantitation**

Whole plants at the first leaf stage were harvested for extraction of genomic DNA, following the protocol of E-Z 96® Mag-Bind® Plant DNA Kit (Cat. No. M1027, Omega bio-tek, USA). The Qubit® dsDNA HS Assay Kit (Cat. no. Q32851 or Q32854) was used for DNA quantification.

### **Step 2. Preparation of master mix for multiplex PCR reactions**

Add the following components to each PCR tube: 4 µl 5× Ion AmpliSeq™ HiFi Mix, 10 µl the synthesized multiplex primers and 10 ng extracted genomic DNA of one of varieties A-N. Vortex the master mix thoroughly and spin down to collect droplets.

### **Step 3. Amplify SSR targets**

Load each PCR tube from step 2 to the thermal cycler (2720, ABI, USA), and run the following program to amplify SSR targets: 99°C/2 min; 16 or 30 cycles of 99°C/15 sec and 60°C/8 min. For the S5 and MiSeq Ampli-Seq libraries, the PCR cycles were 16 and 30, respectively.

### **Step 4. Partially digest the primer sequences on both ends of SSR amplicons**

During the synthesis of SSR multiplex primers, base T in the primers was substituted by base U. Therefore, the primers on both ends of SSR amplicons could be digested by FuPa reagent. Add 2 µl FuPa Reagent to each PCR tube from step 3. Vortex thoroughly and spin down to collect droplets. Load the PCR tube to the thermal cycler (2720, ABI, USA) and run the following program: 50°C/10 min; 55°C/10 min and 60°C/20 min.

### **Step 5. Ligate sequencing adapters to SSR amplicons**

Add the following components to each PCR tube from step 4: 4µl Switch Solution, 2µl DNA ligase and 2µl barcode adapter for S5 Ampli-Seq libraries (Cat. No. 44712150, ABI, USA) or for MiSeq Ampli-Seq libraries (Cat. No. FC-131-2001, Illumina, USA). Vortex the mixture thoroughly and spin down to collect droplets. Load the PCR tube to the thermal cycler (2720, ABI, USA), and run the following program: 22°C/30 min and 72°C/10 min.

### **Step 6. Purify the ligation products of SSR amplicons**

Add 45µl Agencourt® AMPure® XP Reagent (Cat. No. A63881, Beckman Counter, USA) to each PCR tube from step 5. The following purify steps follows the recommended procedure in the manual book of Agencourt® AMPure® XP Reagent. The purified SSR amplicons were eluted in 50µl Low TE. The

purified ligation products were the SSR Ampli-Seq libraries and ready for high-throughput sequencing.

**Step 7. High-throughput sequencing SSR libraries**

The S5 SSR Ampli-Seq libraries from step 6 were sequenced on the S5 system in our lab. Thirty days later, the MiSeq SSR Ampli-Seq libraries were sequenced on the MiSeq system in BestNovo Co., Ltd, China, using a 2×300 bp paired-end sequencing mode.

## Supplemental Table 1: The rice varieties used in this study

| Variety code | Variety name    | The types of the variety                       |
|--------------|-----------------|------------------------------------------------|
| A            | t2092           | <i>Indica</i> CMS line                         |
| B            | ShengDao 808    | <i>Japanica</i> inbred rice                    |
| C            | JiNongDa 858    | <i>Japanica</i> inbred rice                    |
| D            | AoFuB           | <i>Indica</i> maintainer line                  |
| E            | HuaZhan         | <i>Indica</i> inbred rice                      |
| F            | Jiangyu F8412A  | <i>dica</i> CMS (Cytoplasm Male Sterile) lines |
| G            | YueGuang No. H3 | <i>Japanica</i> inbred rice                    |
| H            | Ha 04-29        | <i>Japanica</i> inbred rice                    |
| I            | 9311            | NILs of R11                                    |
| J            | R11             | NILs of 9311                                   |
| K            | IR24            | NILs of R21                                    |
| L            | R21             | NILs of IR24                                   |
| M            | D62B            | NILs of R62                                    |
| N            | R62             | NILs of D62B                                   |

**Supplemental Table 2: The genotypes, coverages, stutter ratios and amplicon lengths of partial target SSRs in varieties A-H**

| SSR | Amplicon    | Primer sequence                |                                |
|-----|-------------|--------------------------------|--------------------------------|
|     |             | forward                        | Reverse                        |
| 1   | AMPL1119350 | AAATCAGGGTGCATGAACGACATA       | TGTGAGGAGAAGAGACGAACAATTG      |
| 2   | AMPL1118764 | AGAAGAAGGAGAGATCTGAGCCAT       | AACTTTTATCAAGAACCTGTACTACATGCT |
| 3   | AMPL1122080 | CCAGTTCACCTTGTCATAAGCTTTC      | GGATTCTATGTTTGCCATAAGTTTGATGAT |
| 4   | AMPL1118986 | CAAGCTCATGGAGGAAAGTGTG         | CGGATTAGCACATGACTACTTAAACTTGAA |
| 5   | AMPL1122956 | CCACCTTAGGATTTAAGCGAGGAGTA     | GCCTCCTTAGATAGCAGGAGAGATTC     |
| 6   | AMPL1122956 | CCACCTTAGGATTTAAGCGAGGAGTA     | GCCTCCTTAGATAGCAGGAGAGATTC     |
| 7   | AMPL1119030 | ACCATTGTACATGCCCTAACATCAG      | GGTCATATTTTCAGTTCTCATCACAGGATC |
| 8   | AMPL1119030 | ACCATTGTACATGCCCTAACATCAG      | GGTCATATTTTCAGTTCTCATCACAGGATC |
| 9   | AMPL1119030 | ACCATTGTACATGCCCTAACATCAG      | GGTCATATTTTCAGTTCTCATCACAGGATC |
| 10  | AMPL1120471 | AATCTCACCAGTATATGCTCTTCGATTTTT | GCCAAAACAGAAAACCAAATATTTGTCCTC |
| 11  | AMPL1121792 | AAAACCAACATATCAACTACTGTCAGCT   | CCCATGTCACTGGAGATCAATGC        |
| 12  | AMPL1122521 | CTGTCGTGAGCTTCACCATTCT         | CTAGCCCAGCAAACACATGGAT         |
| 13  | AMPL1119455 | TCTGACTTCTGAGAGGTGCTCAT        | CCTTGATTTTCTTCGGTACTACTTCTCCTC |
| 14  | AMPL1122277 | GCGGTCTTGCGTGATCAAAG           | CGCCGTGTGTGTACAAATAATATGC      |
| 15  | AMPL1122277 | GCGGTCTTGCGTGATCAAAG           | CGCCGTGTGTGTACAAATAATATGC      |
| 16  | AMPL1118548 | CCACCACCTCCCATGTTTCAAG         | GCCGATACATTTGACTGTCCGAAA       |
| 17  | AMPL1118548 | CCACCACCTCCCATGTTTCAAG         | GCCGATACATTTGACTGTCCGAAA       |
| 18  | AMPL1142246 | GTCCAGCTACAGCAGCTTCA           | CGGCTCTTCTTCTTCTTCTTCTTCG      |
| 19  | AMPL1142246 | GTCCAGCTACAGCAGCTTCA           | CGGCTCTTCTTCTTCTTCTTCTTCG      |
| 20  | AMPL1122643 | TTGATTGTTTGTTCCTTATGCAAAGGTTT  | GGGATAAATCTGAAAAGAGAAGTGACAGA  |
| 21  | AMPL1118456 | GATCATAACGACACCATTGATTCTGTG    | ACTTACTGAGATGATTTAAGTCGGCAATTA |
| 22  | AMPL1118841 | CGACGCGTCCTTTCGTTT             | CCCAAACCGAATCCTGACTAACC        |
| 23  | AMPL1121609 | CAAATAACAGTCAAATTGGACCAAATGTT  | TATTGTTTGCATAGCTCTTTCACATTCATG |
| 24  | AMPL1142057 | GGCATGTACGTTTTGTTCGGAT         | CCAATAGGTACAAATGAACAGCATTTTGAA |
| 25  | AMPL1142057 | GGCATGTACGTTTTGTTCGGAT         | CCAATAGGTACAAATGAACAGCATTTTGAA |
| 26  | AMPL1123212 | AAACCAAATGACAGTCCTGGACTTA      | TTTGATCGTCTGACATCATCTTAGC      |

**Supplemental Table 2: The genotypes, coverages, stutter ratios and amplicon lengths of partial target SSRs in varieties A-H**

| SSR | A_MiSeq  |          |               |                 | B_MiSeq  |          |               |                 | C_MiSeq  |          |               |                 | Genotype |
|-----|----------|----------|---------------|-----------------|----------|----------|---------------|-----------------|----------|----------|---------------|-----------------|----------|
|     | Genotype | Coverage | Stutter ratio | Amplicon length | Genotype | Coverage | Stutter ratio | Amplicon length | Genotype | Coverage | Stutter ratio | Amplicon length |          |
| 1   | AT32     | 2        | 0.50          | 245             | AT6      | 896      | 0.01          | 193             | NA       | NA       | NA            | NA              | AT6      |
| 2   | CAGG5    | 87       | 0.02          | 275             | CAGG4    | 125      | 0.01          | 271             | CAGG5    | 212      | 0.00          | 275             | CAGG4    |
| 3   | TAGA5    | 1771     | 0.02          | 275             | TAGA4    | 2553     | 0.01          | 265             | TAGA5    | 2275     | 0.02          | 275             | TAGA4    |
| 4   | AACA5    | 218      | 0.01          | 275             | AACA5    | 167      | 0.02          | 288             | AACA5    | 293      | 0.01          | 275             | AACA5    |
| 5   | GC6      | 1569     | 0.05          | 273             | GC5      | 893      | 0.08          | 273             | GC5      | 1492     | 0.51          | 273             | GC6      |
| 6   | GCGT5    | 1345     | 0.19          | 273             | GCGT4    | 895      | 0.01          | 273             | GCGT3    | 1480     | 0.01          | 273             | GCGT1    |
| 7   | AT15     | 1        | 0.00          | NA              | AT14     | 476      | 0.65          | NA              | NA       | NA       | NA            | NA              | AT12     |
| 8   | TTAT1    | 1        | 0.00          | NA              | TTAT1    | 1063     | 0.01          | NA              | NA       | NA       | NA            | NA              | TTAT1    |
| 9   | AT0      | 1        | 0.00          | NA              | AT0      | 1067     | 0.00          | NA              | NA       | NA       | NA            | NA              | AT0      |
| 10  | TA24     | 22       | 0.59          | 279             | NA       | NA       | NA            | NA              | TA24     | 15       | 0.80          | 273             | NA       |
| 11  | CTC8     | 69       | 0.01          | 275             | CTC7     | 120      | 0.04          | 272             | CTC8     | 128      | 0.05          | 275             | CTC7     |
| 12  | TCC7     | 945      | 0.05          | NA              | TCC8     | 738      | 0.07          | NA              | TCC7     | 997      | 0.05          | NA              | TCC8     |
| 13  | AT25     | 2        | 1.00          | 290             | AT3      | 1        | 0.00          | NA              | AT17     | 9        | 1.00          | 280             | AT27     |
| 14  | CGG4     | 49       | 0.02          | #N/A            | CGG4     | 77       | 0.00          | #N/A            | CGG4     | 56       | 0.02          | #N/A            | CGG4     |
| 15  | NA       | NA       | NA            | #N/A            | NA       | NA       | NA            | #N/A            | NA       | NA       | NA            | #N/A            | NA       |
| 16  | TA42     | 9        | 0.67          | 297             | NA       | NA       | NA            | NA              | NA       | NA       | NA            | NA              | NA       |
| 17  | GA11     | 20       | 0.15          | 297             | NA       | NA       | NA            | NA              | NA       | NA       | NA            | NA              | NA       |
| 18  | CGC7     | 1200     | 0.04          | #N/A            | CGC5     | 2611     | 0.02          | #N/A            | CGC7     | 3506     | 0.02          | #N/A            | CGC5     |
| 19  | NA       | NA       | NA            | #N/A            | NA       | NA       | NA            | #N/A            | NA       | NA       | NA            | #N/A            | NA       |
| 20  | CA21     | 8        | 0.63          | 274             | CA19     | 2        | 1.00          | 274             | CA21     | 9        | 0.67          | 275             | CA22     |
| 21  | TA11     | 41       | 0.39          | NA              | TA8      | 47       | 0.11          | NA              | TA10     | 49       | 0.49          | NA              | TA11     |
| 22  | GCC7     | 124      | 0.02          | 256             | GCC7     | 152      | 0.07          | 256             | GCC7     | 273      | 0.04          | 256             | GCC7     |
| 23  | AAAT6    | 413      | 0.02          | 275             | AAAT6    | 9        | 0.22          | 260             | AAAT6    | 492      | 0.02          | 275             | AAAT1    |
| 24  | TA5      | 2        | 0.50          | 285             | TA5      | 75       | 0.00          | NA              | TA5      | 19       | 0.05          | 275             | TA5      |
| 25  | TA13     | 1        | 1.00          | 285             | TA5      | 74       | 0.01          | NA              | TA17     | 12       | 0.33          | 275             | TA5      |
| 26  | NA       | NA       | NA            | NA              | AC7      | 15       | 0.13          | 256             | NA       | NA       | NA            | NA              | AC9      |

**Supplemental Table 2: The genotypes, coverages, stutter ratios and amplicon lengths of partial target SSRs in varieties A-H**

| SSR | D_MiSeq  |               |                 |          | E_MiSeq  |               |                 |          | F_MiSeq  |               |                 |          | G_MiSeq  |               |
|-----|----------|---------------|-----------------|----------|----------|---------------|-----------------|----------|----------|---------------|-----------------|----------|----------|---------------|
|     | Coverage | Stutter ratio | Amplicon length | Genotype | Coverage | Stutter ratio | Amplicon length | Genotype | Coverage | Stutter ratio | Amplicon length | Genotype | Coverage | Stutter ratio |
| 1   | 720      | 0.01          | 193             | AT6      | 699      | 0.02          | 193             | NA       | NA       | NA            | NA              | AT6      | 963      | 0.02          |
| 2   | 119      | 0.03          | 271             | CAGG4    | 118      | 0.03          | 271             | CAGG5    | 121      | 0.02          | 275             | CAGG4    | 138      | 0.06          |
| 3   | 2446     | 0.01          | 265             | TAGA5    | 1965     | 0.01          | 275             | TAGA5    | 1059     | 0.01          | 275             | TAGA5    | 2668     | 0.09          |
| 4   | 189      | 0.02          | 288             | AACA5    | 183      | 0.01          | 275             | AACA5    | 152      | 0.01          | 275             | AACA5    | 258      | 0.01          |
| 5   | 95       | 0.75          | NA              | GC6      | 72       | 0.51          | NA              | GC6      | 2032     | 0.04          | 273             | GC4      | 542      | 0.47          |
| 6   | 1        | 0.00          | NA              | GCGT1    | 1        | 0.00          | NA              | GCGT5    | 1822     | 0.15          | 273             | GCGT5    | 198      | 0.24          |
| 7   | 668      | 0.48          | NA              | AT12     | 639      | 0.51          | NA              | NA       | NA       | NA            | NA              | AT12     | 844      | 0.48          |
| 8   | 1250     | 0.01          | NA              | TTAT1    | 1214     | 0.00          | NA              | NA       | NA       | NA            | NA              | TTAT1    | 1639     | 0.00          |
| 9   | 1252     | 0.00          | NA              | AT0      | 1218     | 0.00          | NA              | NA       | NA       | NA            | NA              | AT0      | 1644     | 0.00          |
| 10  | NA       | NA            | NA              | TA27     | 3        | 0.33          | NA              | TA24     | 11       | 0.91          | 277             | TA23     | 2        | 0.50          |
| 11  | 120      | 0.08          | 272             | CTC7     | 82       | 0.05          | 272             | CTC8     | 96       | 0.03          | 275             | CTC7     | 112      | 0.10          |
| 12  | 679      | 0.09          | NA              | TCC8     | 744      | 0.07          | NA              | TCC7     | 659      | 0.06          | NA              | TCC7     | 765      | 0.50          |
| 13  | 1        | 1.00          | 308             | AT4      | 2        | 0.00          | NA              | AT4      | 3        | 0.67          | 290             | AT4      | 5        | 0.40          |
| 14  | 77       | 0.00          | #N/A            | CGG4     | 66       | 0.00          | #N/A            | CGG4     | 22       | 0.00          | #N/A            | CGG4     | 58       | 0.00          |
| 15  | NA       | NA            | #N/A            | NA       | NA       | NA            | #N/A            | NA       | NA       | NA            | #N/A            | NA       | NA       | NA            |
| 16  | NA       | NA            | NA              | NA       | NA       | NA            | NA              | TA30     | 15       | 0.67          | 273             | TA30     | 5        | 0.80          |
| 17  | NA       | NA            | NA              | NA       | NA       | NA            | NA              | GA11     | 38       | 0.16          | 273             | GA11     | 12       | 0.08          |
| 18  | 2856     | 0.02          | #N/A            | CGC5     | 2016     | 0.49          | #N/A            | CGC7     | 4505     | 0.02          | #N/A            | CGC7     | 4894     | 0.10          |
| 19  | NA       | NA            | #N/A            | NA       | NA       | NA            | #N/A            | NA       | NA       | NA            | #N/A            | NA       | NA       | NA            |
| 20  | 4        | 0.50          | 277             | CA21     | 5        | 1.00          | 275             | CA21     | 5        | 0.40          | 275             | CA21     | 8        | 0.13          |
| 21  | 31       | 0.39          | NA              | TA11     | 1        | 0.00          | NA              | TA10     | 50       | 0.34          | NA              | TA10     | 2        | 0.00          |
| 22  | 197      | 0.03          | 256             | GCC7     | 159      | 0.06          | 256             | GCC7     | 221      | 0.05          | 256             | GCC7     | 194      | 0.05          |
| 23  | 4        | 0.75          | 246             | AAAT6    | 27       | 0.04          | 275             | AAAT6    | 305      | 0.02          | 275             | AAAT6    | 368      | 0.02          |
| 24  | 54       | 0.02          | NA              | TA5      | 65       | 0.00          | 258             | TA5      | 95       | 0.03          | NA              | TA5      | 31       | 0.00          |
| 25  | 55       | 0.00          | NA              | TA6      | 62       | 0.03          | 258             | TA5      | 95       | 0.02          | NA              | TA6      | 30       | 0.03          |
| 26  | 2        | 0.00          | 271             | AC17     | 3        | 1.00          | 277             | AC9      | 1        | 0.00          | 270             | AC8      | 2        | 0.50          |



**Supplemental Table 2: The genotypes, coverages, stutter ratios and amplicon lengths of partial target SSRs in varieties A-H**

| SSR | H_MiSeq         |          |          |               | A_S5            |          |          |               | B_S5            |          |          |               |                 |
|-----|-----------------|----------|----------|---------------|-----------------|----------|----------|---------------|-----------------|----------|----------|---------------|-----------------|
|     | Amplicon length | Genotype | Coverage | Stutter ratio | Amplicon length | Genotype | Coverage | Stutter ratio | Amplicon length | Genotype | Coverage | Stutter ratio | Amplicon length |
| 1   | 193             | AT30_AT4 | 1        | 0.00          | 251             | AT6      | 1        | 0.00          | 147             | AT6      | 168      | 0.02          | 161             |
| 2   | 271             | CAGG5    | 132      | 0.02          | 275             | CAGG5    | 31       | 0.06          | 231             | CAGG4    | 48       | 0.04          | 227             |
| 3   | 275             | TAGA5    | 2101     | 0.01          | 275             | TAGA5    | 380      | 0.02          | 223             | TAGA4    | 373      | 0.04          | 214             |
| 4   | 275             | AACA5    | 208      | 0.01          | 275             | AACA5    | 82       | 0.07          | 227             | AACA5    | 85       | 0.12          | 240             |
| 5   | NA              | GC6      | 2002     | 0.04          | 273             | GC6      | 186      | 0.18          | 223             | GC5      | 184      | 0.10          | 227             |
| 6   | NA              | GCGT5    | 1935     | 0.07          | 273             | GCGT5    | 157      | 0.45          | 223             | GCGT4    | 226      | 0.01          | 227             |
| 7   | NA              | AT12     | 1        | 0.00          | NA              | NA       | NA       | NA            | NA              | AT14     | 71       | 0.27          | 158             |
| 8   | NA              | TTAT1    | 1        | 0.00          | NA              | NA       | NA       | NA            | NA              | TTAT1    | 105      | 0.00          | 158             |
| 9   | NA              | AT0      | 1        | 0.00          | NA              | NA       | NA       | NA            | NA              | AT0      | 102      | 0.02          | 158             |
| 10  | NA              | TA23     | 5        | 0.80          | NA              | NA       | NA       | NA            | NA              | NA       | NA       | NA            | NA              |
| 11  | 272             | CTC8     | 102      | 0.05          | 275             | CTC8     | 49       | 0.12          | 231             | CTC7     | 54       | 0.07          | 228             |
| 12  | NA              | TCC7     | 948      | 0.05          | NA              | TCC7     | 272      | 0.04          | 229             | TCC8     | 103      | 0.07          | 232             |
| 13  | 282             | AT3      | 23       | 0.26          | NA              | AT1      | 2        | 0.50          | 195             | AT2      | 1        | 1.00          | 155             |
| 14  | #N/A            | CGG4     | 38       | 0.03          | #N/A            | CGG4     | 19       | 0.00          | #N/A            | CGG4     | 25       | 0.08          | #N/A            |
| 15  | #N/A            | NA       | NA       | NA            | #N/A            | NA       | NA       | NA            | #N/A            | NA       | NA       | NA            | #N/A            |
| 16  | 273             | NA       | NA       | NA            | NA              | NA       | NA       | NA            | NA              | NA       | NA       | NA            | NA              |
| 17  | 273             | NA       | NA       | NA            | NA              | NA       | NA       | NA            | NA              | NA       | NA       | NA            | NA              |
| 18  | #N/A            | CGC7     | 3273     | 0.02          | #N/A            | CGC7     | 105      | 0.07          | #N/A            | CGC5     | 190      | 0.02          | #N/A            |
| 19  | #N/A            | NA       | NA       | NA            | #N/A            | NA       | NA       | NA            | #N/A            | NA       | NA       | NA            | #N/A            |
| 20  | 275             | CA21     | 8        | 0.25          | 275             | CA21     | 1        | 1.00          | 221             | CA22     | 1        | 1.00          | 188             |
| 21  | NA              | TA11     | 30       | 0.23          | NA              | TA11     | 33       | 0.45          | 236             | TA8      | 78       | 0.08          | 230             |
| 22  | 256             | GCC7     | 192      | 0.02          | 256             | GCC7     | 9        | 0.11          | 220             | GCC7     | 10       | 0.10          | 221             |
| 23  | 275             | AAAT6    | 420      | 0.03          | 275             | AAAT6    | 88       | 0.26          | 217             | AAAT6    | 47       | 0.26          | 114             |
| 24  | NA              | NA       | NA       | NA            | NA              | NA       | NA       | NA            | NA              | TA5      | 77       | 0.01          | 221             |
| 25  | NA              | NA       | NA       | NA            | NA              | NA       | NA       | NA            | NA              | TA5      | 76       | 0.01          | 221             |
| 26  | 269             | AC15     | 1        | 0.00          | NA              | AC14     | 1        | 0.00          | 228             | AC7      | 46       | 0.17          | 208             |

**Supplemental Table 2: The genotypes, coverages, stutter ratios and amplicon lengths of partial target SSRs in varieties A-H**

| SSR | C_S5     |          |               |                 | D_S5     |          |               |                 | E_S5     |          |               |                 |
|-----|----------|----------|---------------|-----------------|----------|----------|---------------|-----------------|----------|----------|---------------|-----------------|
|     | Genotype | Coverage | Stutter ratio | Amplicon length | Genotype | Coverage | Stutter ratio | Amplicon length | Genotype | Coverage | Stutter ratio | Amplicon length |
| 1   | NA       | NA       | NA            | NA              | AT6      | 115      | 0.03          | 148             | AT6      | 168      | 0.02          | 161             |
| 2   | CAGG5    | 22       | 0.09          | 231             | CAGG4    | 55       | 0.02          | 227             | CAGG4    | 41       | 0.05          | 227             |
| 3   | TAGA5    | 193      | 0.01          | 224             | TAGA4    | 247      | 0.02          | 214             | TAGA5    | 286      | 0.02          | 224             |
| 4   | AACA5    | 20       | 0.15          | 227             | AACA5    | 85       | 0.05          | 240             | AACA5    | 82       | 0.05          | 227             |
| 5   | GC7      | 86       | 0.74          | NA              | GC6      | 22       | 0.18          | NA              | GC6      | 11       | 0.27          | NA              |
| 6   | GCGT3    | 61       | 0.08          | NA              | GCGT0    | 1        | 0.00          | NA              | NA       | NA       | NA            | NA              |
| 7   | NA       | NA       | NA            | NA              | AT12     | 76       | 0.22          | 155             | AT12     | 87       | 0.22          | 155             |
| 8   | NA       | NA       | NA            | NA              | TTAT1    | 115      | 0.01          | 155             | TTAT1    | 132      | 0.00          | 155             |
| 9   | NA       | NA       | NA            | NA              | AT0      | 109      | 0.05          | 155             | AT0      | 131      | 0.01          | 155             |
| 10  | NA       | NA       | NA            | NA              | NA       | NA       | NA            | NA              | NA       | NA       | NA            | NA              |
| 11  | CTC8     | 40       | 0.05          | 231             | CTC7     | 45       | 0.02          | 228             | CTC7     | 87       | 0.08          | 228             |
| 12  | TCC7     | 248      | 0.05          | 229             | TCC8     | 74       | 0.14          | 232             | TCC8     | 102      | 0.10          | 232             |
| 13  | AT3      | 11       | 0.27          | 153             | AT4      | 2        | 1.00          | 210             | AT2      | 27       | 0.00          | 232             |
| 14  | CGG4     | 28       | 0.00          | #N/A            | CGG4     | 22       | 0.09          | #N/A            | CGG4     | 32       | 0.03          | #N/A            |
| 15  | NA       | NA       | NA            | #N/A            | NA       | NA       | NA            | #N/A            | NA       | NA       | NA            | #N/A            |
| 16  | NA       | NA       | NA            | NA              | NA       | NA       | NA            | NA              | NA       | NA       | NA            | NA              |
| 17  | NA       | NA       | NA            | NA              | NA       | NA       | NA            | NA              | NA       | NA       | NA            | NA              |
| 18  | CGC7     | 127      | 0.02          | #N/A            | CGC5     | 184      | 0.03          | #N/A            | CGC5     | 117      | 0.36          | #N/A            |
| 19  | NA       | NA       | NA            | #N/A            | NA       | NA       | NA            | #N/A            | NA       | NA       | NA            | #N/A            |
| 20  | NA       | NA       | NA            | NA              | CA21     | 1        | 1.00          | 239             | CA21     | 1        | 1.00          | 177             |
| 21  | TA10     | 19       | 0.16          | 234             | TA11     | 34       | 0.29          | 236             | NA       | NA       | NA            | NA              |
| 22  | GCC7     | 11       | 0.18          | 219             | GCC7     | 2        | 0.50          | 206             | GCC7     | 10       | 0.30          | 222             |
| 23  | AAAT6    | 24       | 0.21          | 229             | AAAT6    | 24       | 0.33          | 232             | AAAT6    | 43       | 0.23          | 218             |
| 24  | TA5      | 2        | 0.00          | 239             | TA5      | 49       | 0.00          | 221             | TA5      | 35       | 0.00          | 224             |
| 25  | TA19     | 1        | 1.00          | 239             | TA5      | 48       | 0.02          | 221             | TA6      | 33       | 0.06          | 224             |
| 26  | NA       | NA       | NA            | NA              | AC9      | 4        | 0.00          | 231             | NA       | NA       | NA            | NA              |

**Supplemental Table 2: The genotypes, coverages, stutter ratios and amplicon lengths of partial target SSRs in varieties A-H**

| SSR | F_S5     |          |               |                 | G_S5     |          |               |                 | H_S5     |          |               |                 |
|-----|----------|----------|---------------|-----------------|----------|----------|---------------|-----------------|----------|----------|---------------|-----------------|
|     | Genotype | Coverage | Stutter ratio | Amplicon length | Genotype | Coverage | Stutter ratio | Amplicon length | Genotype | Coverage | Stutter ratio | Amplicon length |
| 1   | AT6      | 1        | 0.00          | 161             | AT6      | 181      | 0.02          | 161             | AT6      | 1        | 0.00          | 148             |
| 2   | CAGG5    | 45       | 0.07          | 231             | CAGG4    | 31       | 0.10          | 227             | CAGG5    | 48       | 0.04          | 231             |
| 3   | TAGA5    | 116      | 0.03          | 224             | TAGA5    | 128      | 0.12          | 223             | TAGA5    | 265      | 0.01          | 223             |
| 4   | AACA5    | 68       | 0.12          | 227             | AACA5    | 32       | 0.16          | 227             | AACA5    | 138      | 0.06          | 227             |
| 5   | GC6      | 223      | 0.17          | 223             | GC4      | 14       | 0.71          | NA              | GC6      | 222      | 0.17          | 223             |
| 6   | GCGT5    | 194      | 0.39          | 223             | GCGT5    | 11       | 0.18          | NA              | GCGT5    | 203      | 0.34          | 223             |
| 7   | AT12     | 1        | 0.00          | 155             | AT12     | 106      | 0.26          | 155             | NA       | NA       | NA            | NA              |
| 8   | TTAT1    | 1        | 0.00          | 155             | TTAT1    | 159      | 0.00          | 155             | NA       | NA       | NA            | NA              |
| 9   | AT0      | 1        | 0.00          | 155             | AT0      | 154      | 0.03          | 155             | NA       | NA       | NA            | NA              |
| 10  | NA       | NA       | NA            | NA              | NA       | NA       | NA            | NA              | NA       | NA       | NA            | NA              |
| 11  | CTC8     | 37       | 0.24          | 230             | CTC7     | 64       | 0.03          | 228             | CTC8     | 56       | 0.11          | 230             |
| 12  | TCC7     | 235      | 0.03          | 229             | TCC7     | 260      | 0.20          | 229             | TCC7     | 303      | 0.05          | 229             |
| 13  | AT1      | 10       | 0.10          | 177             | AT2      | 35       | 0.09          | 232             | AT1      | 6        | 0.17          | 163             |
| 14  | CGG4     | 23       | 0.04          | #N/A            | CGG4     | 27       | 0.00          | #N/A            | CGG4     | 22       | 0.00          | #N/A            |
| 15  | NA       | NA       | NA            | #N/A            | NA       | NA       | NA            | #N/A            | NA       | NA       | NA            | #N/A            |
| 16  | NA       | NA       | NA            | NA              | NA       | NA       | NA            | NA              | NA       | NA       | NA            | NA              |
| 17  | NA       | NA       | NA            | NA              | NA       | NA       | NA            | NA              | NA       | NA       | NA            | NA              |
| 18  | CGC7     | 175      | 0.06          | #N/A            | CGC7     | 168      | 0.17          | #N/A            | CGC7     | 120      | 0.05          | #N/A            |
| 19  | NA       | NA       | NA            | #N/A            | NA       | NA       | NA            | #N/A            | NA       | NA       | NA            | #N/A            |
| 20  | CA20     | 2        | 0.50          | 224             | CA19     | 1        | 1.00          | 213             | NA       | NA       | NA            | NA              |
| 21  | TA10     | 30       | 0.13          | 234             | TA10     | 4        | 0.25          | 234             | TA11     | 61       | 0.18          | 236             |
| 22  | GCC7     | 5        | 0.20          | 220             | GCC7     | 3        | 1.00          | 223             | GCC7     | 5        | 0.20          | 219             |
| 23  | AAAT6    | 34       | 0.15          | 218             | AAAT6    | 15       | 0.33          | 218             | AAAT6    | 52       | 0.38          | 217             |
| 24  | TA5      | 28       | 0.00          | 221             | TA5      | 21       | 0.00          | 224             | NA       | NA       | NA            | NA              |
| 25  | TA5      | 27       | 0.04          | 221             | TA6      | 20       | 0.05          | 224             | NA       | NA       | NA            | NA              |
| 26  | AC9      | 4        | 0.25          | 203             | AC9      | 5        | 0.20          | 186             | AC14     | 2        | 0.50          | 226             |

### Supplemental Table S3: the accuracy of AmpSeq-SSR in pseudo-heterozygous

| $i^{\text{th}}$ varieties | $j^{\text{th}}$ varieties | Correct genotypes | Referece genotypes | Accuracy $A_{ij}$ |
|---------------------------|---------------------------|-------------------|--------------------|-------------------|
| A                         | F                         | 1396              | 1446               | 96.54%            |
| A                         | B                         | 1084              | 1173               | 92.41%            |
| A                         | E                         | 1087              | 1166               | 93.22%            |
| A                         | H                         | 1409              | 1463               | 96.31%            |
| A                         | C                         | 1388              | 1447               | 95.92%            |
| A                         | D                         | 1078              | 1166               | 92.45%            |
| B                         | H                         | 1098              | 1179               | 93.13%            |
| B                         | D                         | 1240              | 1294               | 95.83%            |
| C                         | F                         | 1412              | 1458               | 96.84%            |
| C                         | B                         | 1102              | 1183               | 93.15%            |
| C                         | H                         | 1403              | 1458               | 96.23%            |
| C                         | D                         | 1092              | 1178               | 92.70%            |
| E                         | F                         | 1105              | 1183               | 93.41%            |
| E                         | B                         | 1210              | 1267               | 95.50%            |
| E                         | H                         | 1085              | 1158               | 93.70%            |
| E                         | C                         | 1101              | 1175               | 93.70%            |
| E                         | D                         | 1240              | 1285               | 96.50%            |
| F                         | B                         | 1112              | 1196               | 92.98%            |
| F                         | H                         | 1424              | 1467               | 97.07%            |
| F                         | D                         | 1110              | 1186               | 93.59%            |
| H                         | D                         | 1071              | 1155               | 92.73%            |
| Average                   |                           | 1202.24           | 1270.62            | 94.47%            |
| Standard deviation        |                           | 140.41            | 126.51             | 1.69%             |

**Supplemental Table 4: The decrease of SSR stutter ratios in variety B-H when using only the target SSRs whose stutter ratios were no greater than 0.2 in variety A.**

| Variety            | B      | C      | D      | E      | F      | G      | H      | Average |
|--------------------|--------|--------|--------|--------|--------|--------|--------|---------|
| Before selecting   | 12.83% | 15.96% | 14.31% | 14.95% | 16.18% | 17.27% | 14.42% | 15.13%  |
| After selecting    | 7.19%  | 6.80%  | 8.27%  | 9.12%  | 7.39%  | 10.57% | 6.25%  | 7.94%   |
| The decrease ratio | 43.97% | 57.38% | 42.23% | 39.01% | 54.31% | 38.82% | 56.66% | 47.48%  |

**Supplemental Table 5: Some SSRs tend to be incorrectly genotyped**

| Variety 1 | Variety 2 | Comparable SSRs (N <sub>ij</sub> ) | Observed error-prone SSRs | Inconsistent SSRs only in variety 1 | Inconsistent SSRs only in variety 2 |
|-----------|-----------|------------------------------------|---------------------------|-------------------------------------|-------------------------------------|
| B         | C         | 921                                | 0                         | 3                                   | 4                                   |
| B         | G         | 1036                               | 1                         | 3                                   | 3                                   |
| B         | H         | 1062                               | 1                         | 2                                   | 4                                   |
| A         | B         | 1030                               | 1                         | 4                                   | 2                                   |
| E         | H         | 1047                               | 1                         | 4                                   | 2                                   |
| A         | G         | 944                                | 0                         | 2                                   | 4                                   |
| B         | F         | 1030                               | 0                         | 3                                   | 3                                   |
| B         | E         | 1137                               | 2                         | 1                                   | 4                                   |
| D         | H         | 1057                               | 1                         | 3                                   | 2                                   |
| G         | H         | 969                                | 0                         | 3                                   | 2                                   |
| D         | F         | 1023                               | 0                         | 3                                   | 2                                   |
| C         | G         | 891                                | 0                         | 1                                   | 4                                   |
| F         | G         | 954                                | 0                         | 2                                   | 3                                   |
| C         | E         | 913                                | 0                         | 2                                   | 3                                   |
| C         | D         | 915                                | 0                         | 3                                   | 2                                   |
| C         | F         | 1107                               | 1                         | 2                                   | 2                                   |
| A         | E         | 1007                               | 1                         | 1                                   | 3                                   |
| E         | F         | 1010                               | 1                         | 3                                   | 1                                   |
| D         | G         | 1045                               | 1                         | 3                                   | 1                                   |
| A         | D         | 1019                               | 0                         | 2                                   | 2                                   |
| D         | E         | 1164                               | 2                         | 1                                   | 2                                   |
| C         | H         | 1152                               | 2                         | 2                                   | 1                                   |
| A         | C         | 1118                               | 2                         | 1                                   | 2                                   |
| B         | D         | 1197                               | 1                         | 1                                   | 2                                   |
| F         | H         | 1286                               | 3                         | 2                                   | 0                                   |
| A         | F         | 1218                               | 2                         | 1                                   | 1                                   |
| A         | H         | 1309                               | 5                         | 1                                   | 0                                   |
| E         | G         | 1077                               | 3                         | 0                                   | 0                                   |

**Supplemental Table 6: Many inconsistent SSRs in the eighth variety can be filtered by the other seven varieties**

| The eighth variety            | A      | B      | C      | D      | E      | F      | G      | H      | Average |
|-------------------------------|--------|--------|--------|--------|--------|--------|--------|--------|---------|
| Consistent SSR ( $M_i$ )      | 1383   | 1314   | 1216   | 1334   | 1309   | 1367   | 1201   | 1460   | 2646    |
| Inconsistent SSRs ( $m_i$ )   | 8      | 8      | 5      | 6      | 8      | 6      | 6      | 10     | 7.125   |
| Error-prone SSRs ( $m_{ei}$ ) | 6      | 6      | 2      | 4      | 7      | 3      | 4      | 8      | 5       |
| The filtering rate*           | 75.00% | 75.00% | 40.00% | 66.67% | 87.50% | 50.00% | 66.67% | 80.00% | 70.18%  |

\*The filtering rate = Error-prone SSRs / Inconsistent SSRs.

**Supplemental Table 7: Comparable SSR pairs and length differences between their amplicons**

| Variety pairs | Comparable SSR pairs |                              |                                         |       |                    |      |                   |      |                   |    |        |                   |
|---------------|----------------------|------------------------------|-----------------------------------------|-------|--------------------|------|-------------------|------|-------------------|----|--------|-------------------|
|               | Total (No.1)         | With different SSR genotypes |                                         |       |                    |      |                   |      |                   |    |        |                   |
|               |                      | Total                        | Length difference between SSR genotypes |       |                    |      |                   |      |                   |    | No.6   | Ratio (No.6/No.2) |
|               |                      |                              | > 5 bp                                  | ≤ 5bp | Between 1 bp and 5 |      | = 0 bp            |      |                   |    |        |                   |
| No.2          | Ratio (No.2/No.1)    | No.3                         | Ratio (No.3/No.2)                       | No.4  | Ratio (No.4/No.2)  | No.5 | Ratio (No.5/No.2) | No.6 | Ratio (No.6/No.2) |    |        |                   |
| A.vs.H        | 1774                 | 119                          | 6.71%                                   | 51    | 42.86%             | 68   | 57.14%            | 62   | 52.10%            | 6  | 5.04%  |                   |
| F.vs.H        | 1711                 | 130                          | 7.60%                                   | 46    | 35.38%             | 84   | 64.62%            | 79   | 60.77%            | 5  | 3.85%  |                   |
| G.vs.E        | 1426                 | 137                          | 9.61%                                   | 62    | 45.26%             | 75   | 54.74%            | 60   | 43.80%            | 15 | 10.95% |                   |
| A.vs.F        | 1750                 | 152                          | 8.69%                                   | 59    | 38.82%             | 93   | 61.18%            | 84   | 55.26%            | 9  | 5.92%  |                   |
| H.vs.C        | 1712                 | 162                          | 9.46%                                   | 58    | 35.80%             | 104  | 64.20%            | 99   | 61.11%            | 5  | 3.09%  |                   |
| F.vs.C        | 1693                 | 190                          | 11.22%                                  | 76    | 40.00%             | 114  | 60.00%            | 108  | 56.84%            | 6  | 3.16%  |                   |
| A.vs.C        | 1757                 | 190                          | 10.81%                                  | 71    | 37.37%             | 119  | 62.63%            | 109  | 57.37%            | 10 | 5.26%  |                   |
| B.vs.D        | 1418                 | 228                          | 16.08%                                  | 107   | 46.93%             | 121  | 53.07%            | 103  | 45.18%            | 18 | 7.89%  |                   |
| E.vs.D        | 1400                 | 265                          | 18.93%                                  | 131   | 49.43%             | 134  | 50.57%            | 119  | 44.91%            | 15 | 5.66%  |                   |
| B.vs.E        | 1375                 | 277                          | 20.15%                                  | 136   | 49.10%             | 141  | 50.90%            | 126  | 45.49%            | 15 | 5.42%  |                   |
| G.vs.D        | 1440                 | 305                          | 21.18%                                  | 145   | 47.54%             | 160  | 52.46%            | 133  | 43.61%            | 27 | 8.85%  |                   |
| G.vs.B        | 1412                 | 326                          | 23.09%                                  | 137   | 42.02%             | 189  | 57.98%            | 160  | 49.08%            | 29 | 8.90%  |                   |
| F.vs.E        | 1411                 | 597                          | 42.31%                                  | 330   | 55.28%             | 267  | 44.72%            | 221  | 37.02%            | 46 | 7.71%  |                   |
| F.vs.B        | 1433                 | 597                          | 41.66%                                  | 316   | 52.93%             | 281  | 47.07%            | 241  | 40.37%            | 40 | 6.70%  |                   |
| F.vs.G        | 1584                 | 603                          | 38.07%                                  | 295   | 48.92%             | 308  | 51.08%            | 242  | 40.13%            | 66 | 10.95% |                   |
| F.vs.D        | 1427                 | 611                          | 42.82%                                  | 327   | 53.52%             | 284  | 46.48%            | 237  | 38.79%            | 47 | 7.69%  |                   |
| B.vs.C        | 1424                 | 611                          | 42.91%                                  | 324   | 53.03%             | 287  | 46.97%            | 254  | 41.57%            | 33 | 5.40%  |                   |
| E.vs.C        | 1413                 | 622                          | 44.02%                                  | 342   | 54.98%             | 280  | 45.02%            | 242  | 38.91%            | 38 | 6.11%  |                   |
| G.vs.C        | 1581                 | 627                          | 39.66%                                  | 310   | 49.44%             | 317  | 50.56%            | 257  | 40.99%            | 60 | 9.57%  |                   |
| B.vs.H        | 1441                 | 634                          | 44.00%                                  | 333   | 52.52%             | 301  | 47.48%            | 261  | 41.17%            | 40 | 6.31%  |                   |
| C.vs.D        | 1430                 | 634                          | 44.34%                                  | 349   | 55.05%             | 285  | 44.95%            | 240  | 37.85%            | 45 | 7.10%  |                   |
| G.vs.H        | 1596                 | 635                          | 39.79%                                  | 304   | 47.87%             | 331  | 52.13%            | 263  | 41.42%            | 68 | 10.71% |                   |
| E.vs.H        | 1419                 | 635                          | 44.75%                                  | 346   | 54.49%             | 289  | 45.51%            | 244  | 38.43%            | 45 | 7.09%  |                   |



|                           |                |               |               |               |               |               |               |               |               |              |               |
|---------------------------|----------------|---------------|---------------|---------------|---------------|---------------|---------------|---------------|---------------|--------------|---------------|
| H.vs.D                    | 1435           | 654           | 45.57%        | 351           | 53.67%        | 303           | 46.33%        | 250           | 38.23%        | 53           | 8.10%         |
| A.vs.E                    | 1458           | 655           | 44.92%        | 361           | 55.11%        | 294           | 44.89%        | 248           | 37.86%        | 46           | 7.02%         |
| A.vs.B                    | 1475           | 658           | 44.61%        | 340           | 51.67%        | 318           | 48.33%        | 278           | 42.25%        | 40           | 6.08%         |
| A.vs.G                    | 1646           | 660           | 40.10%        | 327           | 49.55%        | 333           | 50.45%        | 266           | 40.30%        | 67           | 10.15%        |
| A.vs.D                    | 1480           | 678           | 45.81%        | 361           | 53.24%        | 317           | 46.76%        | 268           | 39.53%        | 49           | 7.23%         |
| <b>Average</b>            | <b>1518.61</b> | <b>449.71</b> | <b>29.61%</b> | <b>228.39</b> | <b>48.28%</b> | <b>221.32</b> | <b>51.72%</b> | <b>187.64</b> | <b>44.65%</b> | <b>33.68</b> | <b>7.07%</b>  |
| <b>Standard Deviation</b> | <b>131.52</b>  | <b>219.87</b> | <b>15.29%</b> | <b>125.39</b> | <b>6.28%</b>  | <b>96.01</b>  | <b>6.28%</b>  | <b>77.27</b>  | <b>7.37%</b>  | <b>20.38</b> | <b>2.18%</b>  |
| <b>Maxium</b>             | <b>1774</b>    | <b>678</b>    | <b>45.81%</b> | <b>361</b>    | <b>55.28%</b> | <b>333</b>    | <b>64.62%</b> | <b>278</b>    | <b>61.11%</b> | <b>68</b>    | <b>10.95%</b> |
| <b>Minium</b>             | <b>1375</b>    | <b>119</b>    | <b>6.71%</b>  | <b>46</b>     | <b>35.38%</b> | <b>68</b>     | <b>44.72%</b> | <b>60</b>     | <b>37.02%</b> | <b>5</b>     | <b>3.09%</b>  |

**Supplemental Table 8: The genotypes, coverages and stutter ratios and amplicon lengths of the differential SSRs between each of the three pairs of NILs**

| Amplicon    | Variety        | Primer sequence               |                                |
|-------------|----------------|-------------------------------|--------------------------------|
|             |                | forward                       | Reverse                        |
| AMPL1562757 | 9311 vs. R11   | GCTTCTCCTGCAGGTTTCATCTC       | CATATGGTCAGCGACAGGTACA         |
| AMPL1562757 | IRBB24 vs. R24 | GCTTCTCCTGCAGGTTTCATCTC       | CATATGGTCAGCGACAGGTACA         |
| AMPL1562757 | D62B vs. R62   | GCTTCTCCTGCAGGTTTCATCTC       | CATATGGTCAGCGACAGGTACA         |
| AMPL1562999 | 9311 vs. R11   | GTGAGACCTTGTAGTGATGTGCTATTTA  | CGGAGAGGAAGAACAGAGAGTTTC       |
| AMPL1563098 | D62B vs. R62   | GGACGATCGCCCTGTACAAG          | CTCAAGGCTCACCTTATTATACTAATCTGC |
| AMPL1563104 | D62B vs. R62   | CTCAATGCCAACTTGATATATATCCGGT  | GTGACGGAGTAATTGTGTTGCA         |
| AMPL1563170 | D62B vs. R62   | ACCTGTCACCTTTACTGTGATCTATTTG  | CGGGCAGGTATTGGGATTATTTATTAATCC |
| AMPL1563183 | D62B vs. R62   | CTATATGCTTTCTGTAATGCAATGCCA   | ACCTTCTTCATATAATGTCAAAGGTTGGAA |
| AMPL1563209 | D62B vs. R62   | AAGAGGCACTGAAAAATACCTCAAGATT  | TCAGATTTGACAGTTTCACAAAGAGGT    |
| AMPL1563216 | D62B vs. R62   | CAAACCTTGCTGCATACACACCTTAAT   | ACCTAACCACCAACCTAACCAAC        |
| AMPL1563217 | D62B vs. R62   | CATGCACACTATTGTTATAGATGCCATTG | CCGTATCTTCATGCATCAACATATCATGA  |
| AMPL1563226 | D62B vs. R62   | TGAGCAGAAGCACTCTAGTATATTTAGCT | GCACATGTTTCGTCGACCAAGAA        |
| AMPL1563228 | D62B vs. R62   | GAAGAGGTGGAGGCCATGT           | GAGACGACGAAGGCAGATAAGTC        |
| AMPL1563230 | D62B vs. R62   | GCTTCTCCTTGTCTCGAAGCAA        | TCCATCCACCAGAGTAAAAGGA         |
| AMPL1563277 | IRBB24 vs. R24 | TCATGTTCAAACGAGCCCAAGAA       | GAGGCTGTGGGTCATTCTTCTC         |
| AMPL1563300 | D62B vs. R62   | CTATCTTGGCGTCCATCTTGAGT       | GTTGAATCAAATACAGTTCGTTTCAGGTT  |
| AMPL1563309 | D62B vs. R62   | CCACACGACACGAGCTAGTA          | GCCATCGCCCTTTTCGTCTT           |
| AMPL1563321 | D62B vs. R62   | CTCCCATCTTTTTGCTGCAATCTTT     | GCGATCGATCGACCTAGCTATTG        |
| AMPL1563350 | D62B vs. R62   | CATGCCTGCTATACCTTCCTGA        | CATCTCTAGCTACTAGTTGTTCTTCTCT   |
| AMPL1563354 | D62B vs. R62   | CCACAGAGTAGCATCAAACGCA        | GCAAAGTTTATGCTCACTTTGCCA       |
| AMPL1563355 | D62B vs. R62   | CACCTCCTCGAAGAACTGCT          | CCGCCATTAATAATTGCTCCAAG        |
| AMPL1563368 | IRBB24 vs. R24 | CGCCAGGATGATGCTCGA            | ATGCCAACACGGTTCATTTAC          |
| AMPL1563368 | D62B vs. R62   | CGCCAGGATGATGCTCGA            | ATGCCAACACGGTTCATTTAC          |
| AMPL1563370 | IRBB24 vs. R24 | GACTTCGTTTCAAGTGGTAAACCTG     | AGCCTATTCTTGTTTTCCCTTCAACATCT  |
| AMPL1563370 | D62B vs. R62   | GACTTCGTTTCAAGTGGTAAACCTG     | AGCCTATTCTTGTTTTCCCTTCAACATCT  |
| AMPL1563371 | IRBB24 vs. R24 | GCGCATTCATGTCATCGTCTCA        | ATCTTTCCAGTTTTTATTGCTCAAAGCTT  |
| AMPL1563371 | D62B vs. R62   | GCGCATTCATGTCATCGTCTCA        | ATCTTTCCAGTTTTTATTGCTCAAAGCTT  |
| AMPL1563372 | IRBB24 vs. R24 | CCGAGGGTTAGCTTGTTAGTGC        | GAACAAGACAAGAGAAGCAATATTTGGTG  |
| AMPL1563372 | D62B vs. R62   | CCGAGGGTTAGCTTGTTAGTGC        | GAACAAGACAAGAGAAGCAATATTTGGTG  |
| AMPL1563384 | D62B vs. R62   | TGTTGTTGTTGCGTCCCTCTA         | CCCGAGCTGGAATGGACTAC           |

**Supplemental Table 8: The genotypes, coverages and stutter ratios and amplicon lengths of the differential SSRs between each of the three pairs of NILs**

| Amplicon    | Variety        | Primer sequence                 |                                 |
|-------------|----------------|---------------------------------|---------------------------------|
|             |                | forward                         | Reverse                         |
| AMPL1563405 | 9311 vs. R11   | GCGTGGAAGTCCAAGATCTTCC          | AAGCCGATCAGGACCGTAAAG           |
| AMPL1563406 | 9311 vs. R11   | GTGGCGAAATCCAGGCAGAT            | GTCGTCGGTTATAAACTTATAATGGTCTGA  |
| AMPL1563411 | D62B vs. R62   | CTGCCCTGCTCTCAAGTTTCTA          | GGGAGAAAACTAACCAAGTGTACTCTTAT   |
| AMPL1563413 | D62B vs. R62   | CAGAAAAAGCCATGCGTGAAGT          | CCGTATCAAAAATTCGATGTGACATATCTC  |
| AMPL1563426 | 9311 vs. R11   | GTAGTGATTGAGAGTAGTACTGTTCACCTTG | ATCTCCTGTGGTCTGTTGAATCTATTG     |
| AMPL1563494 | IRBB24 vs. R24 | ACAACTATCTGGAAGCTTCTGGAAG       | GATATTAGCAGTGGATTCATGGAGCT      |
| AMPL1563540 | D62B vs. R62   | GGATCAGGACAGCACAAGGAATG         | GCGGATGAGATGAGAATTTTCAACTAAAAT  |
| AMPL1563601 | D62B vs. R62   | GGTGTATGAGGGTGGTGACAAG          | TTGTTAGCTGAAACATTACAAAACAAACCT  |
| AMPL1563618 | D62B vs. R62   | CCGTTATAACTGTGAACTGTGATATTTACG  | GGCAGAGAGACCTAATTCCTAGTTGAT     |
| AMPL1563638 | 9311 vs. R11   | GCCTTCTTGCACCGTTGA              | AAGGCAGTTTCACTGACGTGA           |
| AMPL1563638 | D62B vs. R62   | GCCTTCTTGCACCGTTGA              | AAGGCAGTTTCACTGACGTGA           |
| AMPL1563640 | 9311 vs. R11   | TGACCGTACAATCCTACTACTCGT        | GGAAAAATATACTACCTCGAAAAGGTTGGA  |
| AMPL1563640 | D62B vs. R62   | TGACCGTACAATCCTACTACTCGT        | GGAAAAATATACTACCTCGAAAAGGTTGGA  |
| AMPL1563642 | 9311 vs. R11   | TGAGCTTCTCCATCACTCCCAT          | TCAAATCGTTCGACCACGTGAT          |
| AMPL1563671 | D62B vs. R62   | CCCTAGTGGCTGTATCAAGTTACG        | GGCTCTGCTGCTATCGTCATTT          |
| AMPL1563688 | D62B vs. R62   | CGGCCATGTACAGCTCATA             | GGTACCCGTCGAGCATGAAG            |
| AMPL1563697 | D62B vs. R62   | GATAATATCATATGGCGGTTTAGGAGCAT   | GCCCAGCAGGCCTAATGTAC            |
| AMPL1563717 | D62B vs. R62   | GCGCACATGATCATGGTTCAAC          | AGGGATGATTTTACAAGGATTTTCATCAGAA |
| AMPL1563739 | D62B vs. R62   | ACTATTTGAGGGTGTCCAATTGGAC       | GTCAGCCGTGAGTACACCAT            |
| AMPL1563778 | 9311 vs. R11   | GTTCGCTGAATATAATAACGATAGCAATGC  | GACGATCGAGTGAAGACGATGAG         |
| AMPL1563795 | D62B vs. R62   | GCAACGCACTCTCTATCTCGTA          | GATGAGGAATCGAGGGCAGAAAT         |
| AMPL1563807 | IRBB24 vs. R24 | AAACTGACATACAAGGCGATAAAACAATG   | TGAGGTTCGGTCTAGGGTTTTAGTATAAATT |
| AMPL1563810 | IRBB24 vs. R24 | GTGGGCCAAGCTGCACAAG             | TGGTGGTTCGCTAGCTGAC             |
| AMPL1563810 | D62B vs. R62   | GTGGGCCAAGCTGCACAAG             | TGGTGGTTCGCTAGCTGAC             |
| AMPL1563812 | IRBB24 vs. R24 | GGAGCTAAGTCCTTGCCATCG           | GAAAATTGCGAAATAGTACTGTACTGGG    |
| AMPL1563812 | D62B vs. R62   | GGAGCTAAGTCCTTGCCATCG           | GAAAATTGCGAAATAGTACTGTACTGGG    |
| AMPL1563820 | IRBB24 vs. R24 | AACAGTGGTCGCAATTGTTTCAC         | CGGAGGTTGTGGGAGATGATTTT         |
| AMPL1563820 | D62B vs. R62   | AACAGTGGTCGCAATTGTTTCAC         | CGGAGGTTGTGGGAGATGATTTT         |
| AMPL1563821 | IRBB24 vs. R24 | ATATACGTCTTGGTCAGCCAAGTTTATC    | GATTCCTGAACATTCAAACACATAACAT    |
| AMPL1563821 | D62B vs. R62   | ATATACGTCTTGGTCAGCCAAGTTTATC    | GATTCCTGAACATTCAAACACATAACAT    |

**Supplemental Table 8: The genotypes, coverages and stutter ratios and amplicon lengths of the differential SSRs between each of the three pairs of NILs**

| Amplicon    | Variety        | Primer sequence            |                                |
|-------------|----------------|----------------------------|--------------------------------|
|             |                | forward                    | Reverse                        |
| AMPL1563823 | IRBB24 vs. R24 | CAGATCCGGCAATGGTGAAGAT     | GGTATCCTCTAATCTCACCGATCAAATG   |
| AMPL1563823 | D62B vs. R62   | CAGATCCGGCAATGGTGAAGAT     | GGTATCCTCTAATCTCACCGATCAAATG   |
| AMPL1563825 | IRBB24 vs. R24 | TCTTCCGAAGGCTTCGAAC TTT    | TCGTGGTCTCTTCTTCTTCATCCATA     |
| AMPL1563825 | D62B vs. R62   | TCTTCCGAAGGCTTCGAAC TTT    | TCGTGGTCTCTTCTTCTTCATCCATA     |
| AMPL1563826 | D62B vs. R62   | GGCGGTTTAGAAGCGTTTATATGAG  | GTGGTTACAAGAGTCTAAGTATCACTTGAG |
| AMPL1563844 | D62B vs. R62   | CATTGGTTTTGCCTCGCTGAAT     | GTGTGTATCCCACGAAGGAACAA        |
| AMPL1563846 | D62B vs. R62   | GGGCTTCTTCTCCTTCTCTCCA     | CACCAAATATGCAAATACCACCTTTTGTAT |
| AMPL1563850 | D62B vs. R62   | CACTGTGTGAACTGCTGAACAG     | GTGTTGCAGGTAAAGCATGCAA         |
| AMPL1563853 | D62B vs. R62   | TTCTTACATCTGACAGCTGTTTTGGT | TGATCATGTTTACCAAAAACAACACTACA  |
| AMPL1563866 | D62B vs. R62   | CTCCGATGCCTTCTTCTCTTG      | CCTGCGACCCTTCCACTACTATA        |
| AMPL1563876 | D62B vs. R62   | CTAATAGCAATTGTAGGAGCGCCATA | CCTTGTGGTCATGCTTCTCTCATC       |
| AMPL1563877 | D62B vs. R62   | TGGCCACGAAGTTAACTAATTAACAT | GGAGCTCAGATATTTAGCACCTCATATTTT |
| AMPL1563890 | D62B vs. R62   | TTGGCCAATCAAATCCAAAGAACC   | CCAAGAAGAGTGATCAAGAATTGGGTAAAA |
| AMPL1563893 | D62B vs. R62   | GAAAATGTATGGCGAGACCCTACA   | TGTGTCACAAGGCTAATCCTTGTC       |
| AMPL1563896 | D62B vs. R62   | TTGAAGTCGGTGGCGTGT         | AGCGGATGCAGGAGCTCTC            |
| AMPL1563897 | D62B vs. R62   | GATTCTCCTCGCTCATCTGAGTG    | GGGATTCCAAGTCGATGACCAAT        |
| AMPL1563903 | D62B vs. R62   | GCATCCATCCATCCATCATAATGC   | GTACAAATCACTTCTCCAATCCTTACCA   |
| AMPL1563906 | D62B vs. R62   | CAAAGCAGTGCAAAGAACATTTCTCT | GTGTTTATCTACCTCTTTCTAGACCGATA  |

**Supplemental Table 8: The genotypes, coverages and stutter ratios and amplicon lengths of the differential SSRs between each of the three pairs of NILs**

| Amplicon    | Variety        | Receptor parent |          |               | NIL parent  |          |               | SSR location on reference genome |          |          |
|-------------|----------------|-----------------|----------|---------------|-------------|----------|---------------|----------------------------------|----------|----------|
|             |                | Genotype        | Coverage | Stutter ratio | Genotype    | Coverage | Stutter ratio | Chr.                             | Begin    | End      |
| AMPL1562757 | 9311 vs. R11   | CGC4,           | 250      | 0.14          | CGC7,       | 198      | 0.10          | chr11                            | 21463893 | 21463913 |
| AMPL1562757 | IRBB24 vs. R24 | CGC4,           | 279      | 0.10          | CGC7,       | 190      | 0.09          | chr11                            | 21463893 | 21463913 |
| AMPL1562757 | D62B vs. R62   | CGC4,           | 218      | 0.11          | CGC7,       | 142      | 0.11          | chr11                            | 21463893 | 21463913 |
| AMPL1562999 | 9311 vs. R11   | GA10,           | 90       | 0.06          | GA8,        | 70       | 0.11          | chr7                             | 22587884 | 22587905 |
| AMPL1563098 | D62B vs. R62   | CTT11,          | 219      | 0.09          | CTT7,       | 234      | 0.05          | chr1                             | 2377852  | 2377899  |
| AMPL1563104 | D62B vs. R62   | NA0,TC3,        | 22       | 0.09          | AG13,TC4,   | 78       | 0.27          | chr1                             | 4636778  | 4636982  |
| AMPL1563170 | D62B vs. R62   | TA13,           | 27       | 0.41          | TA12,       | 24       | 0.38          | chr1                             | 30551523 | 30551546 |
| AMPL1563183 | D62B vs. R62   | CT6,TG9,        | 180      | 0.09          | CT7,TG10,   | 138      | 0.17          | chr1                             | 35240853 | 35240887 |
| AMPL1563209 | D62B vs. R62   | TCC11,          | 23       | 0.13          | TCC9,       | 45       | 0.18          | chr10                            | 4780097  | 4780126  |
| AMPL1563216 | D62B vs. R62   | GA8,            | 31       | 0.10          | GA7,        | 14       | 0.21          | chr10                            | 12483340 | 12483351 |
| AMPL1563217 | D62B vs. R62   | AG9,            | 95       | 0.25          | AG10,       | 52       | 0.35          | chr10                            | 12761302 | 12761321 |
| AMPL1563226 | D62B vs. R62   | TCG5,           | 297      | 0.14          | TCG9,       | 90       | 0.11          | chr10                            | 18888150 | 18888173 |
| AMPL1563228 | D62B vs. R62   | AG11,TG4,       | 113      | 0.17          | AG18,TG4,   | 27       | 0.19          | chr10                            | 19150841 | 19150906 |
| AMPL1563230 | D62B vs. R62   | CT8,GCC7,       | 59       | 0.25          | CT8,GCC8,   | 56       | 0.27          | chr10                            | 19512581 | 19512640 |
| AMPL1563277 | IRBB24 vs. R24 | AG19,           | 35       | 0.26          | AG7,        | 297      | 0.10          | chr11                            | 18274552 | 18274565 |
| AMPL1563300 | D62B vs. R62   | TCA16,          | 45       | 0.18          | TCA15,      | 20       | 0.15          | chr12                            | 2433282  | 2433308  |
| AMPL1563309 | D62B vs. R62   | CG6,CCG8,       | 94       | 0.15          | CG6,CCG5,   | 151      | 0.15          | chr12                            | 8834290  | 8834446  |
| AMPL1563321 | D62B vs. R62   | CA4,GCC7,       | 103      | 0.13          | CA4,GCC8,   | 84       | 0.12          | chr12                            | 14109142 | 14109175 |
| AMPL1563350 | D62B vs. R62   | GAA15,          | 192      | 0.11          | GAA8,       | 694      | 0.06          | chr2                             | 3836790  | 3836816  |
| AMPL1563354 | D62B vs. R62   | 5_TCT12,AG8,N   | 10       | 0.60          | NA0,AG7,CT4 | 50       | 0.08          | chr2                             | 5453224  | 5453366  |
| AMPL1563355 | D62B vs. R62   | CCG6,           | 141      | 0.10          | CCG9,       | 109      | 0.09          | chr2                             | 6159658  | 6159681  |
| AMPL1563368 | IRBB24 vs. R24 | AAT4_AAT7,      | 489      | 0.03          | AAT4_AAT10  | 394      | 0.08          | chr2                             | 8760457  | 8760474  |
| AMPL1563368 | D62B vs. R62   | AAT6,           | 481      | 0.07          | AAT4_AAT10  | 283      | 0.08          | chr2                             | 8760457  | 8760474  |
| AMPL1563370 | IRBB24 vs. R24 | AGA9,           | 186      | 0.13          | AGA8,       | 539      | 0.07          | chr2                             | 11068833 | 11068862 |
| AMPL1563370 | D62B vs. R62   | AGA9,           | 325      | 0.09          | AGA8,       | 440      | 0.10          | chr2                             | 11068833 | 11068862 |
| AMPL1563371 | IRBB24 vs. R24 | ATG22,          | 134      | 0.37          | ATG15,      | 274      | 0.18          | chr2                             | 11389818 | 11389844 |
| AMPL1563371 | D62B vs. R62   | ATG18,          | 184      | 0.33          | ATG15,      | 188      | 0.20          | chr2                             | 11389818 | 11389844 |
| AMPL1563372 | IRBB24 vs. R24 | GTCT6,GTAT4,    | 168      | 0.08          | GTCT4,GTAT4 | 104      | 0.04          | chr2                             | 11466628 | 11466679 |
| AMPL1563372 | D62B vs. R62   | GTCT6,GTAT4,    | 131      | 0.10          | GTCT4,GTAT4 | 85       | 0.02          | chr2                             | 11466628 | 11466679 |
| AMPL1563384 | D62B vs. R62   | TC10,TCG6,      | 45       | 0.09          | TC9,TCG6,   | 18       | 0.33          | chr2                             | 18770047 | 18770137 |

**Supplemental Table 8: The genotypes, coverages and stutter ratios and amplicon lengths of the differential SSRs between each of the three pairs of NILs**

| Amplicon    | Variety        | Receptor parent |          |               | NIL parent    |          |               | SSR location on reference genome |          |          |
|-------------|----------------|-----------------|----------|---------------|---------------|----------|---------------|----------------------------------|----------|----------|
|             |                | Genotype        | Coverage | Stutter ratio | Genotype      | Coverage | Stutter ratio | Chr.                             | Begin    | End      |
| AMPL1563405 | 9311 vs. R11   | TCG4,GCG5,      | 120      | 0.37          | TCG4,GCG8,    | 44       | 0.30          | chr2                             | 25505108 | 25505143 |
| AMPL1563406 | 9311 vs. R11   | GCC5,           | 271      | 0.04          | GCC7,         | 230      | 0.08          | chr2                             | 25672593 | 25672616 |
| AMPL1563411 | D62B vs. R62   | TAA17,          | 15       | 0.27          | TAA10,        | 14       | 0.14          | chr2                             | 28872633 | 28872680 |
| AMPL1563413 | D62B vs. R62   | AG8,            | 208      | 0.08          | AG15,         | 43       | 0.28          | chr2                             | 29585757 | 29585772 |
| AMPL1563426 | 9311 vs. R11   | GA16,           | 23       | 0.26          | GA20,         | 29       | 0.41          | chr3                             | 2454209  | 2454248  |
| AMPL1563494 | IRBB24 vs. R24 | GT8,GA13,       | 220      | 0.15          | GT9,GA14,     | 117      | 0.50          | chr3                             | 33157739 | 33157790 |
| AMPL1563540 | D62B vs. R62   | TTAA3,          | 202      | 0.02          | TTAA5,        | 259      | 0.03          | chr4                             | 18599429 | 18599448 |
| AMPL1563601 | D62B vs. R62   | AG8,            | 117      | 0.15          | AG10,         | 87       | 0.22          | chr5                             | 4295803  | 4295826  |
| AMPL1563618 | D62B vs. R62   | GCA8,           | 248      | 0.15          | GCA9,         | 179      | 0.40          | chr5                             | 16811593 | 16811619 |
| AMPL1563638 | 9311 vs. R11   | AG6,TTTA5,      | 62       | 0.06          | AG5,TTTA16,   | 35       | 0.20          | chr5                             | 25016101 | 25016222 |
| AMPL1563638 | D62B vs. R62   | AG6,TTTA5,      | 53       | 0.09          | AG5,TTTA16,   | 24       | 0.21          | chr5                             | 25016101 | 25016222 |
| AMPL1563640 | 9311 vs. R11   | CAC5,CGA7,CG7,  | 157      | 0.22          | AC7,CGA5,CC   | 165      | 0.13          | chr5                             | 25771849 | 25772019 |
| AMPL1563640 | D62B vs. R62   | CAC5,CGA7,CG7,  | 150      | 0.21          | AC7,CGA5,CC   | 103      | 0.12          | chr5                             | 25771849 | 25772019 |
| AMPL1563642 | 9311 vs. R11   | C4,CCG5,AG15,N  | 87       | 0.54          | C4,CCG5,AG9,I | 43       | 0.47          | chr5                             | 26910831 | 26911031 |
| AMPL1563671 | D62B vs. R62   | CTG5,           | 229      | 0.04          | CTG6,         | 175      | 0.05          | chr6                             | 8815673  | 8815699  |
| AMPL1563688 | D62B vs. R62   | CAC9,           | 36       | 0.11          | CAC11,        | 10       | 0.30          | chr6                             | 16852149 | 16852175 |
| AMPL1563697 | D62B vs. R62   | GATA6,          | 402      | 0.18          | GATA13,       | 332      | 0.10          | chr6                             | 17297623 | 17297678 |
| AMPL1563717 | D62B vs. R62   | TC16,           | 86       | 0.48          | TC11,         | 159      | 0.23          | chr6                             | 23738108 | 23738133 |
| AMPL1563739 | D62B vs. R62   | CCG6,           | 116      | 0.05          | CCG11,        | 30       | 0.10          | chr7                             | 742939   | 742968   |
| AMPL1563778 | 9311 vs. R11   | CATC7,          | 220      | 0.03          | CATC4,        | 185      | 0.02          | chr7                             | 18959633 | 18959668 |
| AMPL1563795 | D62B vs. R62   | GTC5,TCC0,      | 420      | 0.14          | GTC7,TCC0,    | 359      | 0.17          | chr8                             | 551775   | 551799   |
| AMPL1563807 | IRBB24 vs. R24 | ATA5,ATA10,     | 40       | 0.13          | ATA5,ATA13    | 35       | 0.11          | chr8                             | 6763734  | 6763817  |
| AMPL1563810 | IRBB24 vs. R24 | GCG4,           | 273      | 0.04          | GCG11,        | 88       | 0.07          | chr8                             | 9387098  | 9387121  |
| AMPL1563810 | D62B vs. R62   | GCG4,           | 224      | 0.04          | GCG7,         | 147      | 0.04          | chr8                             | 9387098  | 9387121  |
| AMPL1563812 | IRBB24 vs. R24 | GAA7,AG4,       | 83       | 0.06          | GAA9,AG4,     | 50       | 0.06          | chr8                             | 10524151 | 10524184 |
| AMPL1563812 | D62B vs. R62   | GAA7,AG4,       | 126      | 0.05          | GAA8,AG4,     | 54       | 0.09          | chr8                             | 10524151 | 10524184 |
| AMPL1563820 | IRBB24 vs. R24 | CTAT5_CTAT4,    | 243      | 0.05          | CTAT5,        | 271      | 0.03          | chr8                             | 15835187 | 15835222 |
| AMPL1563820 | D62B vs. R62   | CTAT5,          | 258      | 0.05          | CTAT5_CTAT4,  | 228      | 0.04          | chr8                             | 15835187 | 15835222 |
| AMPL1563821 | IRBB24 vs. R24 | CT9,TA11,       | 37       | 0.14          | CT11,TA9,     | 69       | 0.10          | chr8                             | 15972723 | 15972785 |
| AMPL1563821 | D62B vs. R62   | CT10,TA9,       | 41       | 0.17          | CT9,TA11,     | 31       | 0.29          | chr8                             | 15972723 | 15972785 |

**Supplemental Table 8: The genotypes, coverages and stutter ratios and amplicon lengths of the differential SSRs between each of the three pairs of NILs**

| Amplicon    | Variety        | Receptor parent |          |               | NIL parent |          |               | SSR location on reference genome |          |          |
|-------------|----------------|-----------------|----------|---------------|------------|----------|---------------|----------------------------------|----------|----------|
|             |                | Genotype        | Coverage | Stutter ratio | Genotype   | Coverage | Stutter ratio | Chr.                             | Begin    | End      |
| AMPL1563823 | IRBB24 vs. R24 | CGAT5,CT9,      | 201      | 0.21          | CGAT5,CT7, | 320      | 0.16          | chr8                             | 17541009 | 17541050 |
| AMPL1563823 | D62B vs. R62   | CGAT5,CT7,      | 226      | 0.15          | CGAT5,CT9, | 160      | 0.19          | chr8                             | 17541009 | 17541050 |
| AMPL1563825 | IRBB24 vs. R24 | AAG11,AAG5,     | 129      | 0.12          | AAG8,AAG5, | 238      | 0.08          | chr8                             | 17945092 | 17945127 |
| AMPL1563825 | D62B vs. R62   | AAG8,AAG5,      | 249      | 0.09          | AAG11,AAG5 | 96       | 0.14          | chr8                             | 17945092 | 17945127 |
| AMPL1563826 | D62B vs. R62   | AGAT7,          | 58       | 0.05          | AGAT13,    | 90       | 0.14          | chr8                             | 18763626 | 18763685 |
| AMPL1563844 | D62B vs. R62   | AGG5,           | 321      | 0.05          | AGG7,      | 225      | 0.04          | chr8                             | 26322442 | 26322465 |
| AMPL1563846 | D62B vs. R62   | AAG9,           | 278      | 0.13          | AAG6,      | 232      | 0.08          | chr8                             | 26549759 | 26549782 |
| AMPL1563850 | D62B vs. R62   | TG4,TGA11,      | 56       | 0.09          | TG4,TGA4,  | 85       | 0.02          | chr8                             | 26728356 | 26728527 |
| AMPL1563853 | D62B vs. R62   | CT8,            | 287      | 0.12          | CT9,       | 209      | 0.10          | chr8                             | 27049866 | 27049887 |
| AMPL1563866 | D62B vs. R62   | CCT4,CTT9,      | 83       | 0.10          | CCT4,CTT8, | 52       | 0.13          | chr9                             | 152507   | 152564   |
| AMPL1563876 | D62B vs. R62   | GATA5,          | 205      | 0.04          | GATA14,    | 117      | 0.08          | chr9                             | 6601053  | 6601088  |
| AMPL1563877 | D62B vs. R62   | AGAT7,          | 216      | 0.13          | AGAT5,     | 134      | 0.05          | chr9                             | 6780406  | 6780425  |
| AMPL1563890 | D62B vs. R62   | TCT10,          | 28       | 0.18          | TCT5,      | 49       | 0.08          | chr9                             | 10128853 | 10128885 |
| AMPL1563893 | D62B vs. R62   | TTTA5,          | 58       | 0.03          | TTTA3,     | 63       | 0.05          | chr9                             | 12313181 | 12313200 |
| AMPL1563896 | D62B vs. R62   | CGG6,AGG3,      | 53       | 0.13          | CGG3,AGG3, | 151      | 0.02          | chr9                             | 14812719 | 14812798 |
| AMPL1563897 | D62B vs. R62   | TCAA7,          | 145      | 0.06          | TCAA5,     | 135      | 0.08          | chr9                             | 14977341 | 14977376 |
| AMPL1563903 | D62B vs. R62   | CT16,           | 56       | 0.27          | CT11,      | 46       | 0.57          | chr9                             | 19320231 | 19320428 |
| AMPL1563906 | D62B vs. R62   | CT16,           | 17       | 0.53          | CT10,      | 68       | 0.31          | chr9                             | 20174852 | 20174871 |
